# Supplementary material for: Niobium-doped titanium dioxide on a functionalized carbon supported palladium catalyst for enhanced ethanol electro-oxidation
Source: Royal Society of Chemistry journal article supplement (doi:10.1039/c7ra05208a), 2017-01-01
Supplement: c7ra05208a1.pdf [file c7ra05208a1.pdf]

### **Supporting information**

#### **Niobium-Doped Titanium Dioxide on Functionalized Carbon Supported Palladium Catalyst for Enhanced Ethanol Electro-Oxidation**

Weichuan Xu,<sup>a</sup> Litao Yan,<sup>a</sup> Huiqiang Wang,<sup>b</sup> Steven Liaw,<sup>a</sup> Hongmei Luo<sup>\*a</sup>

<sup>a</sup>Department of Chemical and Materials Engineering, New Mexico State University, New  
Mexico 88003, United States

<sup>b</sup>College of Mechanical and Electrical Engineering, Agricultural University of Hebei,  
Baoding 071001, China

\*Corresponding author: hluo@nmsu.edu (H. Luo)

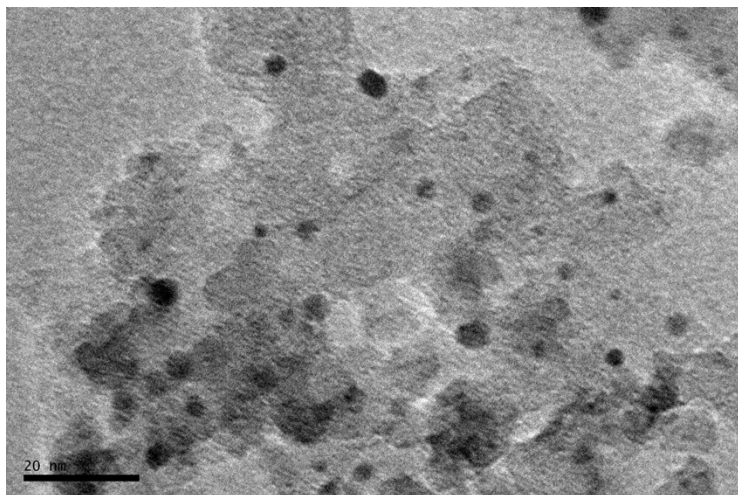

**Fig. S1.** HRTEM of Pd/Nb-TiO<sub>2</sub>-C.

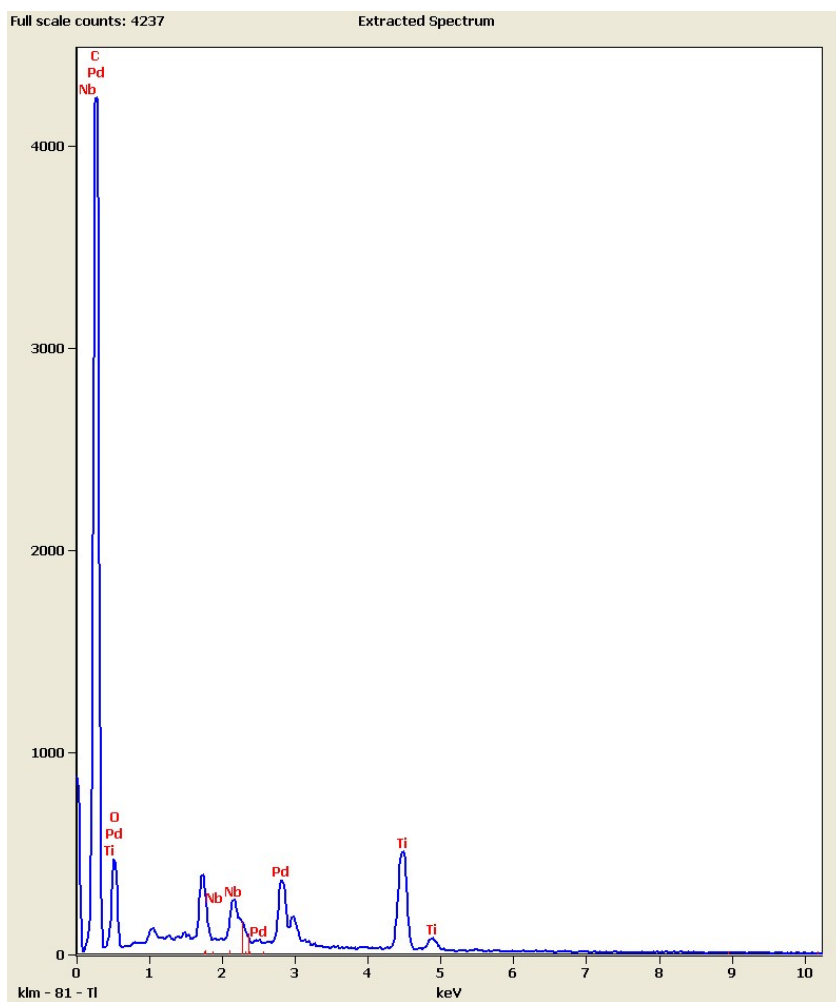

**Fig. S2.** Energy-dispersive X-ray spectroscopy of Pd/Nb-TiO<sub>2</sub>-C.

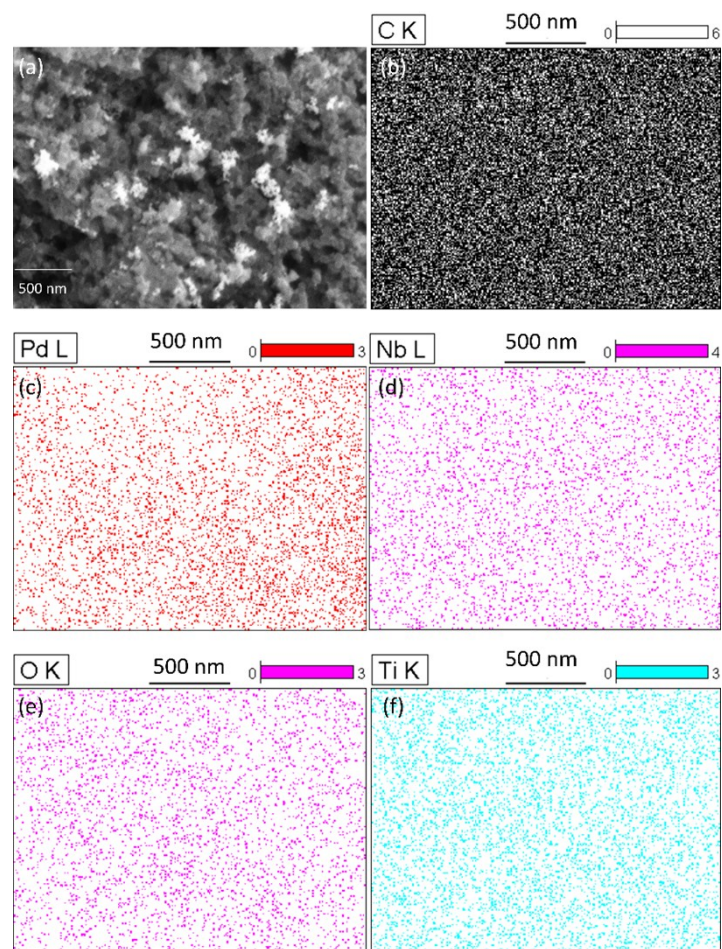

**Fig. S3.** (a) SEM image of Pd/Nb-TiO<sub>2</sub>-C, EDS mapping of (b) C, (c) Pd, (d) Nb, (e) O and (f) Ti.

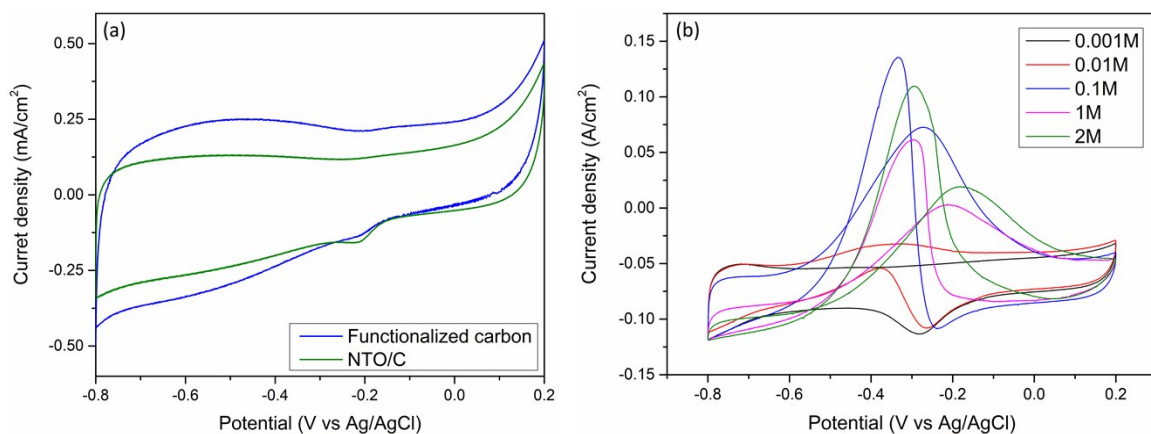

**Fig. S4.** (a) CV of functionalized carbon and niobium-doped titanium dioxide on functionalized carbon (Nb-TiO<sub>2</sub>-C) in 1 M KOH and 1 M Ethanol solution with a scan rate of 20 mV/s; and (b) Ethanol electro-oxidation by Pd/Nb-TiO<sub>2</sub>-C in 1M KOH solution with different ethanol concentrations with a scan rate of 20 mV/s.
